# Supplementary material
Source: PubMed Central journal article supplement (PMC5785216)
Supplement: krnb-14-11-1338241-s001.pdf [file krnb-14-11-1338241-s001.pdf]

## **Supplementary Information**

### **Regulation of a muralytic enzyme-encoding gene by two non-coding RNAs**

Renée J. St-Onge and Marie A. Elliot

Department of Biology and Michael G. DeGroot Institute for Infectious Disease Research, McMaster University,  
Hamilton, Ontario, Canada

## Supplementary Tables

**Table S1.** Bacterial strains, cosmids and plasmids

| Strain/cosmid/<br>plasmid                 | Genotype, properties and/or use                                                                                                                                                                                                                                                                                        | Reference                        |
|-------------------------------------------|------------------------------------------------------------------------------------------------------------------------------------------------------------------------------------------------------------------------------------------------------------------------------------------------------------------------|----------------------------------|
| <b><i>S. coelicolor</i> A3(2) strains</b> |                                                                                                                                                                                                                                                                                                                        |                                  |
| E120                                      | M145 <i>rpfa-scr3097::aac(3)IV</i>                                                                                                                                                                                                                                                                                     | This study                       |
| M145                                      | A3(2) SCP1 <sup>-</sup> SCP2 <sup>-</sup>                                                                                                                                                                                                                                                                              | Kieser, et al. <sup>1</sup>      |
| <b><i>E. coli</i> strains</b>             |                                                                                                                                                                                                                                                                                                                        |                                  |
| BW25113                                   | Cosmid mutagenesis host; <i>lacI</i> <sup>q</sup> <i>rrnB</i> <sub>T14</sub> $\Delta$ <i>lacZ</i> <sub>WJ16</sub> <i>hsdR514</i> $\Delta$ <i>araBAD</i> <sub>AH33</sub> $\Delta$ <i>rhaBAD</i> <sub>LD78</sub>                                                                                                         | Datsenko and Wanner <sup>2</sup> |
| DH5 $\alpha$                              | Plasmid construction strain; F <sup>-</sup> $\phi$ 80 <i>lacZ</i> $\Delta$ M15 $\Delta$ ( <i>lacZYA-argF</i> ) <i>U169</i> <i>recA1</i> <i>endA1</i> <i>hsdR17</i> ( <i>r<sub>K</sub><sup>-</sup></i> , <i>m<sub>K</sub><sup>+</sup></i> ) <i>phoA</i> <i>supE44</i> $\lambda$ <i>thi-1</i> <i>gyrA96</i> <i>relA1</i> | Bethesda Research Laboratories   |
| ET12567                                   | Methylation-deficient strain; F <sup>-</sup> <i>dam13::Tn9</i> <i>dcm6</i> <i>hsdM</i> <i>hsdR</i> <i>recF143</i> <i>zjj201::Tn10</i> <i>galK2</i> <i>galT22</i> <i>ara14</i> <i>lacY1</i> <i>xyl5</i> <i>leuB6</i> <i>thi1</i> <i>tonA31</i> <i>rpsL136</i> <i>hisG4</i> <i>tsx78</i> <i>mtli</i> <i>glnV44</i>       | MacNeil, et al. <sup>3</sup>     |
| <b><i>S. coelicolor</i> cosmids</b>       |                                                                                                                                                                                                                                                                                                                        |                                  |
| StE41                                     | <i>rpfa</i> <sup>+</sup> <i>scr3097</i> <sup>+</sup> <i>bla</i> <i>kan</i>                                                                                                                                                                                                                                             | Redenbach, et al. <sup>4</sup>   |
| StE41c                                    | StE41 <i>rpfa-scr3097::aac(3)IV</i>                                                                                                                                                                                                                                                                                    | This study                       |
| <b>Plasmids</b>                           |                                                                                                                                                                                                                                                                                                                        |                                  |
| pFLUX                                     | Integrative transcriptional reporter vector; <i>ori</i> (pUC18) <i>oriT</i> (RK2) <i>int</i> $\phi$ BT1 <i>attP</i> $\phi$ BT1 <i>luxCDABE</i> (promoterless) <i>aac(3)IV</i>                                                                                                                                          | Craney, et al. <sup>5</sup>      |
| pFLUX-Pos                                 | <i>P<sub>ermE</sub>*</i> transcriptionally fused to <i>luxCDABE</i> in pFLUX                                                                                                                                                                                                                                           | Sexton, et al. <sup>6</sup>      |
| pIJ82                                     | Integrative cloning vector; <i>ori</i> (pUC18) <i>oriT</i> (RK2) <i>int</i> $\phi$ C31 <i>attP</i> $\phi$ C31 <i>hyg</i>                                                                                                                                                                                               | Gift from H. Kieser              |
| pIJ773                                    | Plasmid carrying <i>oriT</i> (RK2) and <i>aac(3)IV</i> flanked by FLP recognition target sites for use in REDIRECT, <i>bla</i>                                                                                                                                                                                         | Gust, et al. <sup>7</sup>        |
| pIJ790                                    | $\lambda$ RED recombination plasmid; <i>oriR101</i> <i>repA101ts</i> <i>araC</i> <i>bet</i> <i>exo</i> <i>gam</i> <i>P<sub>araBAD</sub></i> <i>cat</i>                                                                                                                                                                 | Gust, et al. <sup>7</sup>        |
| pMC222                                    | <i>rpfa</i> 5' UTR- <i>luxCDABE</i> under the transcriptional control of <i>P<sub>ermE</sub>*</i> in pFLUX (WT)                                                                                                                                                                                                        | St-Onge, et al. <sup>8</sup>     |
| pMC223                                    | <i>rpfa</i> 5' UTR $\Delta$ <sub>37-91</sub> - <i>luxCDABE</i> under the transcriptional control of <i>P<sub>ermE</sub>*</i> in pFLUX (P2) <sup>a</sup>                                                                                                                                                                | St-Onge, et al. <sup>8</sup>     |
| pMC224                                    | <i>rpfa</i> 5' UTR $\Delta$ <sub>101-144</sub> - <i>luxCDABE</i> under the transcriptional control of <i>P<sub>ermE</sub>*</i> in pFLUX (P4) <sup>a</sup>                                                                                                                                                              | St-Onge, et al. <sup>8</sup>     |
| pMC225                                    | <i>rpfa</i> 5' UTR $\Delta$ <sub>151-175</sub> - <i>luxCDABE</i> under the transcriptional control of <i>P<sub>ermE</sub>*</i> in pFLUX (P6) <sup>a</sup>                                                                                                                                                              | St-Onge, et al. <sup>8</sup>     |
| pMC226                                    | <i>rpfa</i> 5' UTR $\Delta$ <sub>145-198</sub> - <i>luxCDABE</i> under the transcriptional control of <i>P<sub>ermE</sub>*</i> in pFLUX (P5-7) <sup>a</sup>                                                                                                                                                            | St-Onge, et al. <sup>8</sup>     |
| pMC227                                    | <i>rpfa</i> 5' UTR $\Delta$ <sub>92-214</sub> - <i>luxCDABE</i> under the transcriptional control of <i>P<sub>ermE</sub>*</i> in pFLUX (P3-7) <sup>a</sup>                                                                                                                                                             | St-Onge, et al. <sup>8</sup>     |
| pMC230                                    | <i>rpfa-flag</i> , fused to the 3' end of the <i>rpfa</i> 5' UTR, under the transcriptional control of <i>P<sub>ermE</sub>*</i> ; <i>ori</i> (pUC18) <i>oriT</i> (RK2) <i>int</i> $\phi$ BT1 <i>attP</i> $\phi$ BT1 <i>aac(3)IV</i>                                                                                    | St-Onge, et al. <sup>8</sup>     |
| pMC231                                    | <i>rpfa</i> 5' UTR $\Delta$ <sub>199-208</sub> - <i>luxCDABE</i> under the transcriptional control of <i>P<sub>ermE</sub>*</i> in pFLUX (LIN) <sup>a</sup>                                                                                                                                                             | St-Onge, et al. <sup>8</sup>     |

**Table S1.** Bacterial strains, cosmids and plasmids (continued)

| Strain/cosmid/<br>plasmid | Genotype, properties and/or use                                                                                                                                                                                         | Reference                  |
|---------------------------|-------------------------------------------------------------------------------------------------------------------------------------------------------------------------------------------------------------------------|----------------------------|
| <b>Plasmids</b>           |                                                                                                                                                                                                                         |                            |
| pMC232                    | <i>rpfA</i> 5' UTR (G14C G15C G16C C17G C18G C19G C20G)- <i>luxCDABE</i> under the transcriptional control of P <sub>ermE*</sub> in pFLUX (P0 <sub>Prox.</sub> ) <sup>a</sup>                                           | This study                 |
| pMC233                    | <i>rpfA</i> 5' UTR (G227C G228C G229C G230C A231T T232A C233G)- <i>luxCDABE</i> under the transcriptional control of P <sub>ermE*</sub> in pFLUX (P0 <sub>Dist.</sub> ) <sup>a</sup>                                    | This study                 |
| pMC234                    | <i>rpfA</i> 5' UTR (G14C G15C G16C C17G C18G C19G C20G G227C G228C G229C G230C A231T T232A C233G)- <i>luxCDABE</i> under the transcriptional control of P <sub>ermE*</sub> in pFLUX (P0 <sub>Comp.</sub> ) <sup>a</sup> | This study                 |
| pMC235                    | <i>rpfA</i> 5' UTR (C27G G28C C29G A30T A31T C32G G33C C34G)- <i>luxCDABE</i> under the transcriptional control of P <sub>ermE*</sub> in pFLUX (P1 <sub>Prox.</sub> ) <sup>a</sup>                                      | This study                 |
| pMC236                    | <i>rpfA</i> 5' UTR (G217C C218G G219C T220A C221G G222C)- <i>luxCDABE</i> under the transcriptional control of P <sub>ermE*</sub> in pFLUX (P1 <sub>Dist.</sub> ) <sup>a</sup>                                          | This study                 |
| pMC237                    | <i>rpfA</i> 5' UTR (C27G G28C C29G A30T A31T C32G G33C C34G G217C C218G G219C T220A C221G G222C)- <i>luxCDABE</i> under the transcriptional control of P <sub>ermE*</sub> in pFLUX (P1 <sub>Comp.</sub> ) <sup>a</sup>  | This study                 |
| pMC238                    | <i>rpfA</i> 5' UTR (A55T C56G G57C G59C A60T)- <i>luxCDABE</i> under the transcriptional control of P <sub>ermE*</sub> in pFLUX (P2 <sub>Prox.</sub> ) <sup>a</sup>                                                     | This study                 |
| pMC239                    | <i>rpfA</i> 5' UTR (T68A C69G C71G G72C T73A)- <i>luxCDABE</i> under the transcriptional control of P <sub>ermE*</sub> in pFLUX (P2 <sub>Dist.</sub> ) <sup>a</sup>                                                     | This study                 |
| pMC240                    | <i>rpfA</i> 5' UTR (T239G T242A T244C T245G T246A T247C)- <i>luxCDABE</i> under the transcriptional control of P <sub>ermE*</sub> in pFLUX [Poly(U)] <sup>a</sup>                                                       | This study                 |
| pMC241                    | <i>rpfA</i> under the transcriptional control of P <sub>rpfA</sub> (-504 to +816) in pIJ82 <sup>b</sup>                                                                                                                 | This study                 |
| pMC242                    | <i>scr3097</i> under the transcriptional control of P <sub>scr3097</sub> (+457 to +1,046) in pIJ82 <sup>b</sup>                                                                                                         | This study                 |
| pMC243                    | <i>rpfA</i> and <i>scr3097</i> under the transcriptional control of P <sub>rpfA</sub> and P <sub>scr3097</sub> , respectively (-504 to +1,046), in pIJ82 <sup>b</sup>                                                   | This study                 |
| pTRI-RNA 18S              | Control template; Partial human 18S rRNA gene fragment under the transcriptional control of P <sub>T7</sub> ; <i>EcoRI</i> - and <i>BamHI</i> -digested plasmid                                                         | Ambion                     |
| pUZ8002                   | Non-transmissible <i>oriT</i> mobilizing plasmid; RP4 <i>tra neo</i>                                                                                                                                                    | Paget, et al. <sup>9</sup> |

<sup>a</sup> Numbering is relative to the *rpfA* transcriptional start site, as determined by 5' rapid amplification of cDNA ends.<sup>10</sup>

<sup>b</sup> Numbering is relative to the *rpfA* start codon.

**Table S2.** List of PCR primers and probes

| Primer/probe <sup>a</sup> | Sequence <sup>b</sup>                                                                                                                 | Restriction site | Reference                    |
|---------------------------|---------------------------------------------------------------------------------------------------------------------------------------|------------------|------------------------------|
| <b>PCR primers</b>        |                                                                                                                                       |                  |                              |
| 5UTRF                     | GAA CAG TCG TCG CGT CAA G                                                                                                             |                  | St-Onge, et al. <sup>8</sup> |
| 5UTRR                     | CAC TTA CCT TGG GTC CCC C                                                                                                             |                  | St-Onge, et al. <sup>8</sup> |
| DBLKOR                    | <u>GGA CCG AGC CTA ACC GGC TCC GGG CGA TCG</u><br><u>GCC AGC CGA TGT AGG CTG GAG CTG CTT C</u>                                        |                  | This study                   |
| ermEF                     | GCA <u>CTA GAT CTA</u> GCC CGA CCC GAG CAC GCG C                                                                                      | <i>Bgl</i> II    | St-Onge, et al. <sup>8</sup> |
| IVTrpfAUTR3'              | GGA CGG ACG ACG GTG CTT GCC CTT GC                                                                                                    |                  | St-Onge, et al. <sup>8</sup> |
| IVTrpfAUTR5'              | <u>TAA TAC GAC TCA CTA TAG</u> GGC GCT CGC CAT<br>CGC GGG CCC                                                                         |                  | St-Onge, et al. <sup>8</sup> |
| P1dintF                   | <b>GCG TCG GTG ACC CCT AGA</b> CAT ATG CTG TTT<br>TCC GGC A                                                                           |                  | This study                   |
| P1dintF2                  | <b>TCA CCT CGC AGC GCA GCG</b> TGA GGG GAT CAC<br>ATA TGC T                                                                           |                  | This study                   |
| P1dintR                   | <b>CTA GGG GTC</b> ACC GAC GCC TGC GAG GTG                                                                                            |                  | This study                   |
| P1dintR2                  | <b>GCT GCG</b> CTG CGA GGT GAG CTG TCG GG                                                                                             |                  | This study                   |
| P1pintF                   | <b>TAC CCA TGG CCC CGG GGG</b> ACA GCC GCA ACG<br>CCG AAT C                                                                           |                  | This study                   |
| P1pintF2                  | <b>CCC GAC AGC GCG TTG CGC</b> GAA TCC TGC CAG<br>CGG CCG T                                                                           |                  | This study                   |
| P1pintR                   | <b>CCC CGG GGC</b> CAT GGG TAC TGA TCG AA                                                                                             |                  | This study                   |
| P1pintR2                  | <b>CGC AAC GCG</b> CTG TCG GGG CCC GCC ATG G                                                                                          |                  | This study                   |
| P2dintF                   | <b>GGG AAC AGT CGA GGG CAC</b> AAG CGC CGA AGG<br>CAG GAG C                                                                           |                  | This study                   |
| P2dintR                   | <b>TGC CCT</b> CGA CTG TTC CCG TAC GGC CG                                                                                             |                  | This study                   |
| P2pintF                   | <b>CCA GCG GCC GTT GCG CTA</b> CAG TCG TCG CGT<br>CAA GCG C                                                                           |                  | This study                   |
| P2pintR                   | <b>AGC GCA</b> ACG GCC GCT GGC AGG ATT CG                                                                                             |                  | This study                   |
| pFLUXR                    | GCC GAA GTT GAT GGA CTG GA                                                                                                            |                  | This study                   |
| PLysCUTR                  | <u>TAC GAC AAA TTG CAA AAA TAA TGT TGT CCT</u><br><u>TTT AAA TAA GAT CTG ATA AAA TGT GAA CTC</u><br>GCT CGC CGT CGC GGG CCC CGA CAG C |                  | This study                   |
| PrpfAF-X                  | GCA <u>CTT CTA GAC</u> GAC AGT CTC TGG GCC ATC                                                                                        | <i>Xba</i> I     | This study                   |
| PSCR3097-B                | GCA CTG <u>GAT CCC</u> CTC GGG AGT CCA GGA TTT                                                                                        | <i>Bam</i> HI    | This study                   |
| rpfAF                     | GAG TCC GGC GGC AAC TGG TC                                                                                                            |                  | Sexton, et al. <sup>6</sup>  |
| rpfAR                     | GCT GGG ACT TGC TCG CCT GG                                                                                                            |                  | Sexton, et al. <sup>6</sup>  |
| rpfAR2-K                  | GCA <u>CTG GTA CCG</u> ACG GCG ATG ACA CGG GTG<br>G                                                                                   | <i>Kpn</i> I     | St-Onge, et al. <sup>8</sup> |
| rpfAT-B                   | GCA CTG <u>GAT CCC</u> AAA GGC GGA ACA TGA AAA<br>G                                                                                   | <i>Bam</i> HI    | This study                   |
| rpoBF                     | TCG ACC ACT TCG GCA ACC GC                                                                                                            |                  | Hindra, et al. <sup>11</sup> |
| rpoBR                     | GCG CTC CAT ACG GGC GAG AC                                                                                                            |                  | Hindra, et al. <sup>11</sup> |
| SCO3096R-B2               | GCA CTG <u>GAT CCG</u> GCA CGA GCA TCT CCT TCT<br>T                                                                                   | <i>Bam</i> HI    | This study                   |
| SCO3096R-X                | GCA <u>CTT CTA GAC</u> CTC GGG AGT CCA GGA TTT                                                                                        | <i>Xba</i> I     | This study                   |
| SCO3097F-B                | GCA CTG <u>GAT CCC</u> GCT CCA CCG AGC AGA A                                                                                          | <i>Bam</i> HI    | This study                   |
| SCO3097KOF                | <u>TTT GGA TCT CGT GAG AGA TAG GTC TCA GAA</u><br><u>GCC GTG ATC ATT CCG GGG ATC CGT CGA CC</u>                                       |                  | This study                   |

**Table S2.** List of PCR primers and probes (continued)

| Primer/probe <sup>a</sup> | Sequence <sup>b</sup>                                              | Restriction site | Reference                     |
|---------------------------|--------------------------------------------------------------------|------------------|-------------------------------|
| <b>PCR primers</b>        |                                                                    |                  |                               |
| UintF                     | <u><b>ATC ACA TAG GCA GCG ACC</b></u> CGG CAA GGG CAA<br>GCA CCG T |                  | This study                    |
| UintR                     | <b>GTC GCT GCC</b> TAT GTG ATC CCC TCA CCG AC                      |                  | This study                    |
| <b>Probes</b>             |                                                                    |                  |                               |
| 5S                        | CCC TGC AGT ACC ATC GGC GCT                                        |                  | Swiercz, et al. <sup>12</sup> |
| Scr3097-probe             | TTC ATG TTC CGC CTT TGT TCC GTT C                                  |                  | This study                    |

<sup>a</sup> All primers and probes were purchased from Integrated DNA Technologies.

<sup>b</sup> Sequences complementary to DNA flanking the region to be deleted are underlined once. Restriction sites are underlined twice. Promoter sequences are boxed. Primer extensions, incorporating specific mutations, are bold and italicized.

**Table S3.** PCR amplification conditions

| PCR product                                                        | Frag-<br>ment <sup>e</sup> | Primer <sup>f</sup> |             | Product<br>length<br>(bp) | Annealing<br>temperature<br>(°C) <sup>g</sup> | Extension<br>time<br>(min:sec) |
|--------------------------------------------------------------------|----------------------------|---------------------|-------------|---------------------------|-----------------------------------------------|--------------------------------|
|                                                                    |                            | Forward             | Reverse     |                           |                                               |                                |
| <b>Extended knockout cassette<sup>a</sup></b>                      |                            |                     |             |                           |                                               |                                |
| <i>rpfA-scr3097</i>                                                | N/A                        | SCO3097KOF          | DBLKOR      | 1,460                     | 50-55                                         | 0:30                           |
| <b>Confirming the mutant genotype<sup>b</sup></b>                  |                            |                     |             |                           |                                               |                                |
| <i>rpfA-scr3097</i>                                                | N/A                        | rpfAF               | SCO3096R-B2 | 853                       | 54                                            | 0:45                           |
| <i>rpfA-scr3097::<br/>aac(3)IV</i>                                 | N/A                        | SCO3097KOF          | SCO3096R-B2 | 1,569                     | 53                                            | 1:34                           |
| <b>Cloning complementation and reporter constructs<sup>c</sup></b> |                            |                     |             |                           |                                               |                                |
| <i>P<sub>ermE*</sub>-UTR</i> [P0 <sub>Prox.</sub> ]                | 5'                         | ermEF               | P1pintR     | 309                       | 59                                            | 0:15                           |
| <i>P<sub>ermE*</sub>-UTR</i> [P0 <sub>Prox.</sub> ]                | 3'                         | P1pintF             | rpfAR2-K    | 308                       | N/A                                           | 0:15                           |
| <i>P<sub>ermE*</sub>-UTR</i> [P0 <sub>Dist.</sub> ]                | 5'                         | ermEF               | P1dintR     | 522                       | N/A                                           | 0:15                           |
| <i>P<sub>ermE*</sub>-UTR</i> [P0 <sub>Dist.</sub> ]                | 3'                         | P1dintF             | rpfAR2-K    | 95                        | 65                                            | 0:15                           |
| <i>P<sub>ermE*</sub>-UTR</i> [P1 <sub>Prox.</sub> ]                | 5'                         | ermEF               | P1pintR2    | 323                       | N/A                                           | 0:15                           |
| <i>P<sub>ermE*</sub>-UTR</i> [P1 <sub>Prox.</sub> ]                | 3'                         | P1pintF2            | rpfAR2-K    | 294                       | N/A                                           | 0:15                           |
| <i>P<sub>ermE*</sub>-UTR</i> [P1 <sub>Dist.</sub> ]                | 5'                         | ermEF               | P1dintR2    | 511                       | N/A                                           | 0:15                           |
| <i>P<sub>ermE*</sub>-UTR</i> [P1 <sub>Dist.</sub> ]                | 3'                         | P1dintF2            | rpfAR2-K    | 106                       | 61                                            | 0:15                           |
| <i>P<sub>ermE*</sub>-UTR</i> [P2 <sub>Prox.</sub> ]                | 5'                         | ermEF               | P2pintR     | 349                       | N/A                                           | 0:15                           |
| <i>P<sub>ermE*</sub>-UTR</i> [P2 <sub>Prox.</sub> ]                | 3'                         | P2pintF             | rpfAR2-K    | 268                       | N/A                                           | 0:15                           |
| <i>P<sub>ermE*</sub>-UTR</i> [P2 <sub>Dist.</sub> ]                | 5'                         | ermEF               | P2dintR     | 362                       | N/A                                           | 0:15                           |
| <i>P<sub>ermE*</sub>-UTR</i> [P2 <sub>Dist.</sub> ]                | 3'                         | P2dintF             | rpfAR2-K    | 255                       | N/A                                           | 0:15                           |
| <i>P<sub>ermE*</sub>-UTR</i> [Poly(U)]                             | 5'                         | ermEF               | Uintr       | 536                       | 61                                            | 0:15                           |
| <i>P<sub>ermE*</sub>-UTR</i> [Poly(U)]                             | 3'                         | UintrF              | rpfAR2-K    | 81                        | N/A                                           | 0:15                           |
| SOE-PCR                                                            | N/A                        | ermEF               | rpfAR2-K    | 600                       | 62                                            | 0:15                           |
| <i>rpfA</i>                                                        | N/A                        | PrpfAF-X            | rpfAT-B     | 1,342                     | 65                                            | 0:20                           |
| <i>scr3097</i>                                                     | N/A                        | SCO3096R-X          | SCO3097F-B  | 612                       | 65                                            | 0:15                           |
| <i>rpfA-scr3097</i>                                                | N/A                        | PrpfAF-X            | PSCR3097-B  | 1,572                     | 66                                            | 0:24                           |
| <b>Confirming plasmid introduction<sup>b</sup></b>                 |                            |                     |             |                           |                                               |                                |
| <i>P<sub>ermE*</sub>-UTR</i>                                       | N/A                        | ermEF               | pFLUXR      | 715                       | 61                                            | 0:45                           |
| <i>rpfA</i>                                                        | N/A                        | rpfAF               | rpfAR       | 133                       | 61                                            | 0:45                           |
| <i>scr3097</i>                                                     | N/A                        | SCO3096R-X          | SCO3097F-B  | 612                       | 60                                            | 0:45                           |
| <i>rpfA-scr3097</i>                                                | N/A                        | PrpfAF-X            | PSCR3097-B  | 1,572                     | 53                                            | 1:34                           |
| <b>RT-qPCR<sup>d</sup></b>                                         |                            |                     |             |                           |                                               |                                |
| <i>rpfA</i> CDS                                                    | N/A                        | rpfAF               | rpfAR       | 133                       | 61                                            | 0:45                           |
| <i>rpfA</i> 5' UTR                                                 | N/A                        | 5UTRF               | 5UTRF       | 54                        | 57                                            | 0:45                           |
| <i>rpoB</i>                                                        | N/A                        | rpoBF               | rpoBR       | 86                        | 61                                            | 0:45                           |

**Table S3.** PCR amplification conditions (continued)

| PCR product                                                      | Frag-<br>ment <sup>e</sup> | Primer <sup>f</sup> |              | Product<br>length<br>(bp) | Annealing<br>temperature<br>(°C) <sup>g</sup> | Extension<br>time<br>(min:sec) |
|------------------------------------------------------------------|----------------------------|---------------------|--------------|---------------------------|-----------------------------------------------|--------------------------------|
|                                                                  |                            | Forward             | Reverse      |                           |                                               |                                |
| <b><i>In vitro</i> transcription templates<sup>c</sup></b>       |                            |                     |              |                           |                                               |                                |
| <i>In vitro</i> transcription templates (P <sub>T7</sub> )       | N/A                        | IVTrpfAUTR5'        | IVTrpfAUTR3' | 173-296                   | N/A                                           | 0:15                           |
| <i>In vitro</i> termination assay templates (P <sub>lysC</sub> ) | N/A                        | PLysCUTR            | pFLUXR       | 362-485                   | 66                                            | 0:15                           |

<sup>a</sup> PCR amplification of the extended apramycin resistance cassette was performed using Phusion High-Fidelity DNA polymerase. Amplification conditions were as follows: (i) an initial 3-min denaturation step at 98°C, (ii) 35 amplification cycles consisting of a 10-sec denaturation step at 98°C, a 30-sec annealing step at 50°C for the first 10 cycles then 55°C for the remaining 25 cycles, and a 30-sec extension step at 72°C, and (iii) a final 10-min extension step at 72°C.

<sup>b</sup> Colony PCRs used to confirm strain genotype were performed using *Taq* DNA polymerase with the following amplification conditions: (i) an initial 3-min denaturation step at 95°C, (ii) 35 amplification cycles consisting of a 30-sec denaturation step at 95°C, a 30-sec annealing step, and an extension step at 72°C, and (iii) a final 5-min extension step at 72°C.

<sup>c</sup> PCR amplifications of DNA for cloning experiments were performed using Phusion High-Fidelity DNA polymerase. Amplification conditions were as suggested by the manufacturer.

<sup>d</sup> qPCR amplifications of cDNA were performed using PerfeCTa SYBR Green SuperMix with the following amplification conditions: (i) an initial 3-min denaturation step at 95°C, (ii) 40 amplification cycles consisting of a 15-sec denaturation step at 95°C, a 45-sec annealing/extension step, and fluorescence measurement, and (iii) a melting step (65-95°C with 5-sec fluorescence reads every 0.5°C increase). PCR amplification efficiencies for each primer pair (mean ± standard deviation) were as follows: *rpfa* CDS = 1.076 ± 0.050; *rpfa* 5' UTR = 1.087 ± 0.055; *rpoB* (for *rpfa* CDS assays) = 1.072 ± 0.038; *rpoB* (for *rpfa* 5' UTR assays) = 1.087 ± 0.035.

<sup>e</sup> 5', upstream fragment; 3', downstream fragment.

<sup>f</sup> Primer sequences are located in Table S2.

<sup>g</sup> N/A, a two-step PCR amplification protocol was used.

## Supplementary Figures

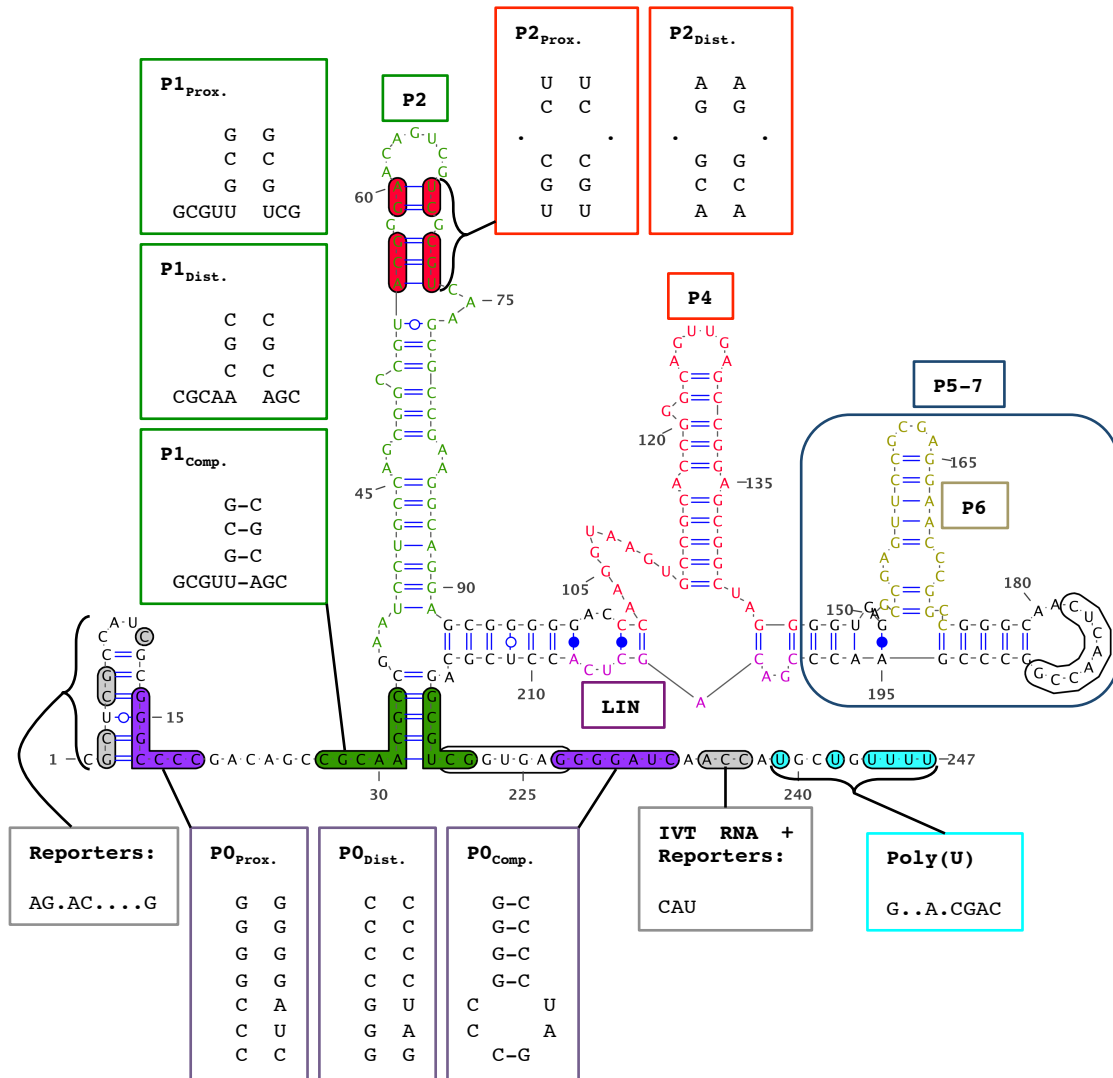

**Fig. S1.** Mutation of the *S. coelicolor rpfa* riboswitch. Regions of the *S. coelicolor rpfa* riboswitch were either deleted (colored letters) or substituted (highlighted letters). The ‘P3-7’ mutant, in which residues 92 to 214 were deleted, is not indicated here for clarity. Two G residues were added at the 5’ end of each RNA transcribed *in vitro* by phage T7 RNA polymerase. The 5’ end of the riboswitch in each transcriptional reporter construct carried additional mutations stemming from cloning. Both *in vitro* transcribed (IVT) RNA and reporter constructs carried an ACC → CAU mutation at the 3’ end of the riboswitch. Structure was drawn using VARNA.<sup>13</sup>



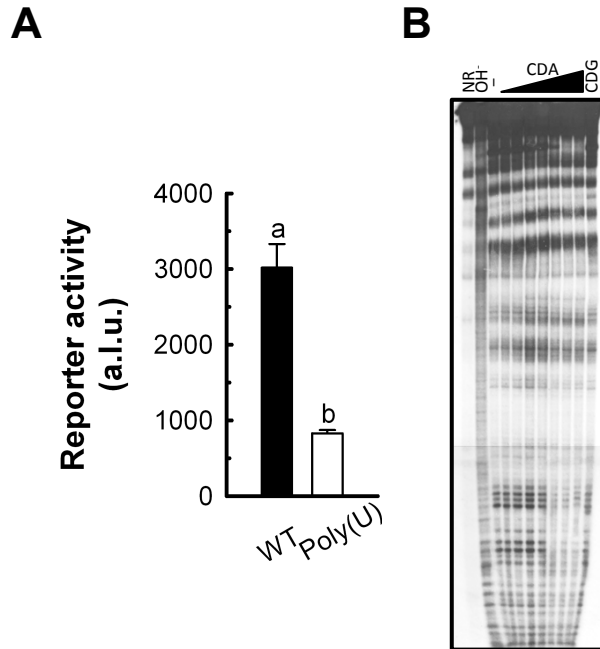

**Fig. S2.** Impact of the U-rich sequence on riboswitch activity and cyclic di-AMP binding. (A) *S. coelicolor* wild-type strains, constitutively transcribing the luciferase reporter gene cluster fused to the 3' end of either the wild-type *rpfA* riboswitch (WT, M145/pMC222) or a mutant derivative in which the U-rich sequence was altered [Poly(U), M145/pMC240], were grown on a sporulation-conducive solid medium. Background-subtracted reporter activity was measured after 44 h. Data are expressed as mean  $\pm$  standard error ( $n = 3$ ). Group means annotated with different letters are significantly different.  $t(4) = 6.94$ ,  $p = 0.002$ . Figure is representative of two independent experimental replicates. a.l.u., arbitrary luminescence units. (B)  $^{32}\text{P}$ -5'-end-labeled poly(U) mutant *rpfA* riboswitch RNA was incubated in the absence of ligand (-) or in the presence of either cyclic di-AMP (CDA) or cyclic di-GMP (CDG) for  $\sim 40$  h at room temperature. Cleaved products were size-fractionated on a denaturing urea-polyacrylamide gel and visualized by autoradiography. Image is representative of two independent replicates. NR, untreated RNA; OH<sup>-</sup>, alkali-treated RNA.

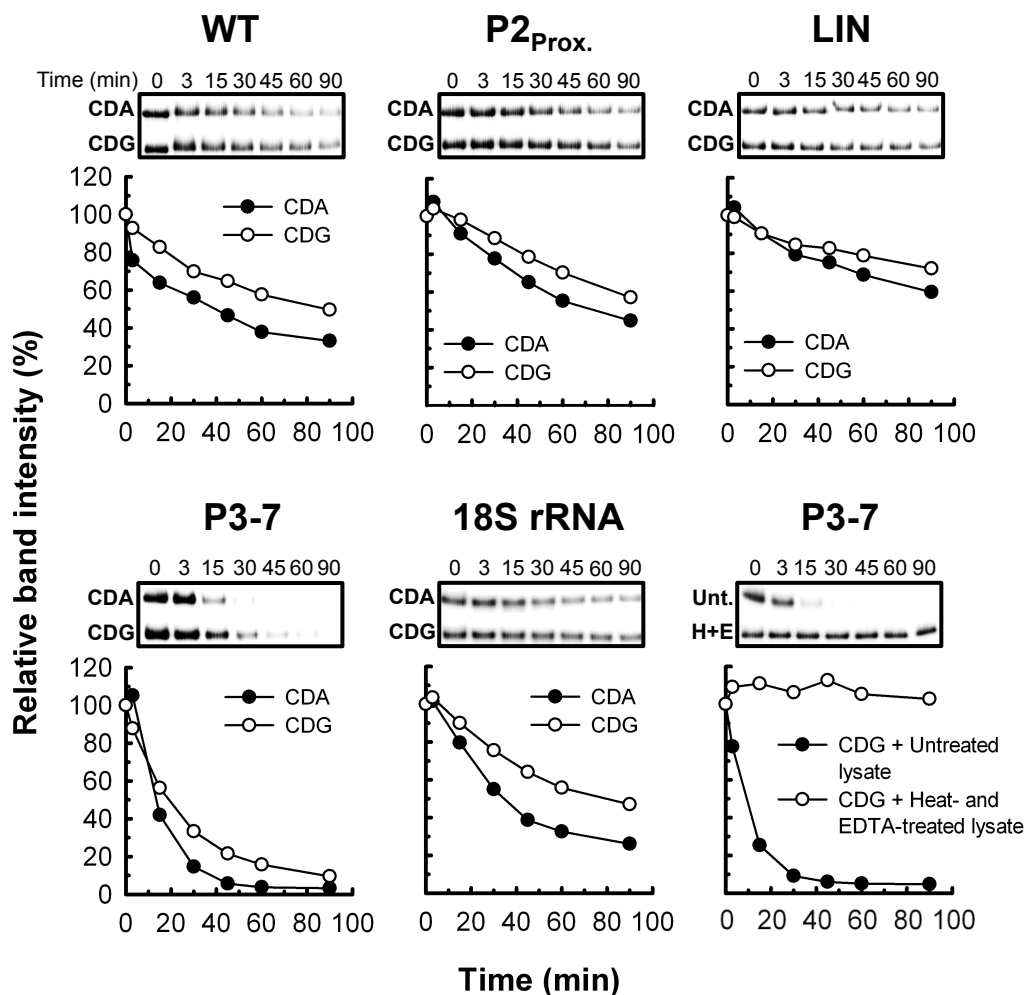

**Fig. S3.** Cyclic di-AMP impact on *rpfA* transcript stability.  $^{32}\text{P}$ -5'-end-labeled *rpfA* riboswitch RNA and partial human 18S rRNA (negative control) were folded and incubated with cyclic di-AMP (CDA) or cyclic di-GMP (CDG) in a buffered solution. Degradation reactions were initiated by supplementing the mixtures with clarified wild-type *S. coelicolor* (M145) lysate. When appropriate, lysate was boiled with 20 mM EDTA at 95°C for 15 min (H+E). After the times indicated, an aliquot of the reaction was collected. Degradation products were size-fractionated on a denaturing urea-polyacrylamide gel, visualized by phosphorimaging, and full-length transcripts were quantified using densitometry. Transcript abundance at any given time-point was expressed relative to transcript levels at 0 min. Figure is representative of two independent experimental replicates. Full-length gel images are presented in Fig. S4. Unt., untreated lysate.

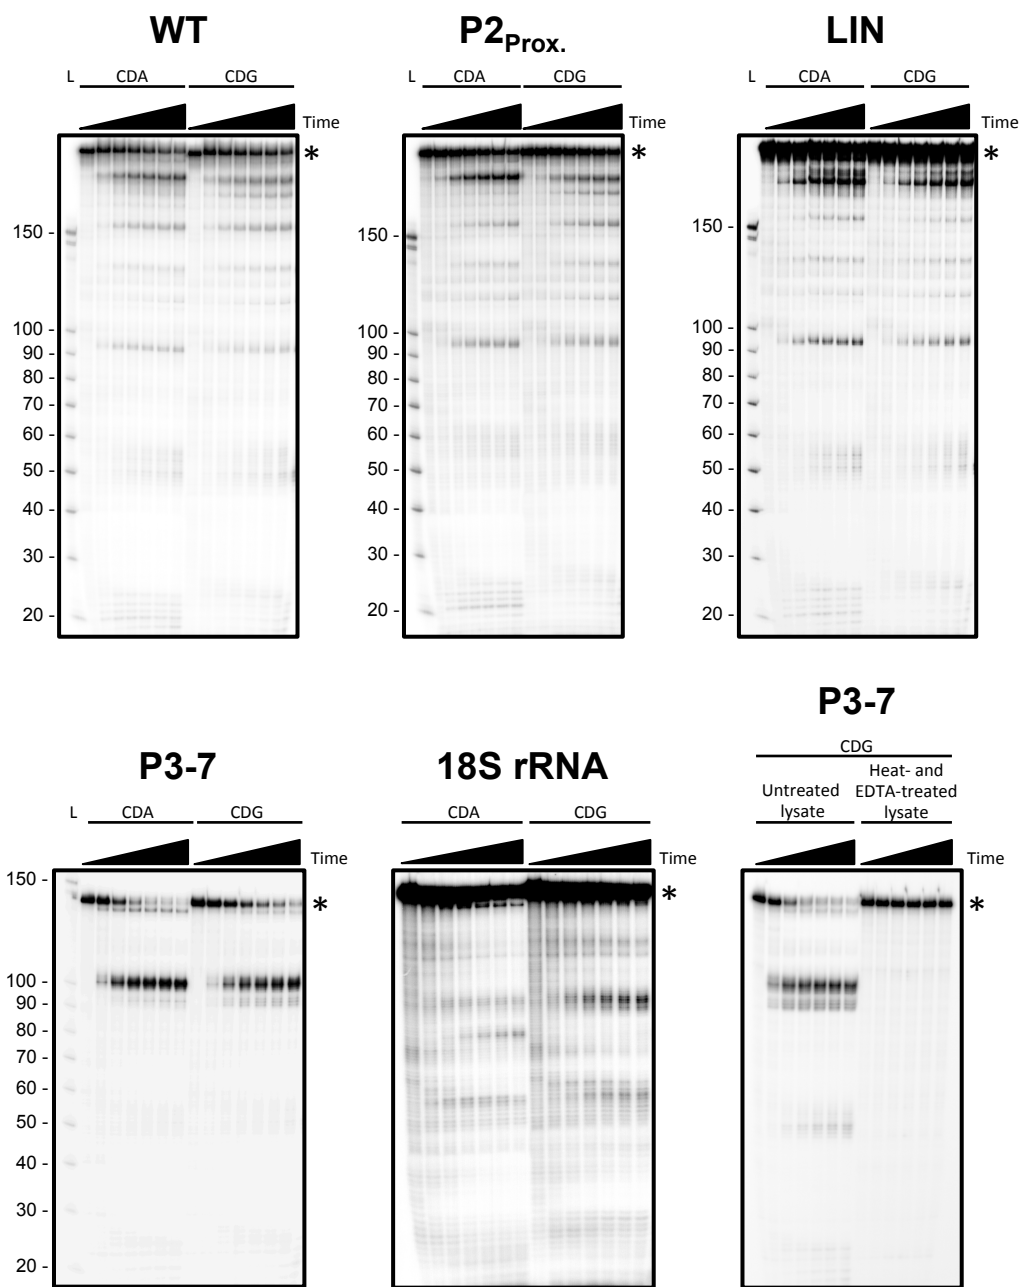

**Fig. S4.** Denaturing polyacrylamide gel electrophoresis analysis of riboswitch RNA degradation products. <sup>32</sup>P-5'-end-labeled *rpfA* riboswitch RNA and partial human 18S rRNA (negative control) were folded and incubated with cyclic di-AMP (CDA) or cyclic di-GMP (CDG) in a buffered solution. Degradation reactions were initiated by supplementing the mixtures with clarified wild-type *S. coelicolor* (M145) lysate. When appropriate, lysate was boiled with 20 mM EDTA at 95°C for 15 min. Aliquots of the reaction were collected periodically over the course of 90 min. Degradation products were size-fractionated on a denaturing urea-polyacrylamide gel and visualized by phosphorimaging. Figure is representative of two independent experimental replicates. L, Decade Marker RNA (Ambion), in nt; \*, full-length transcript.

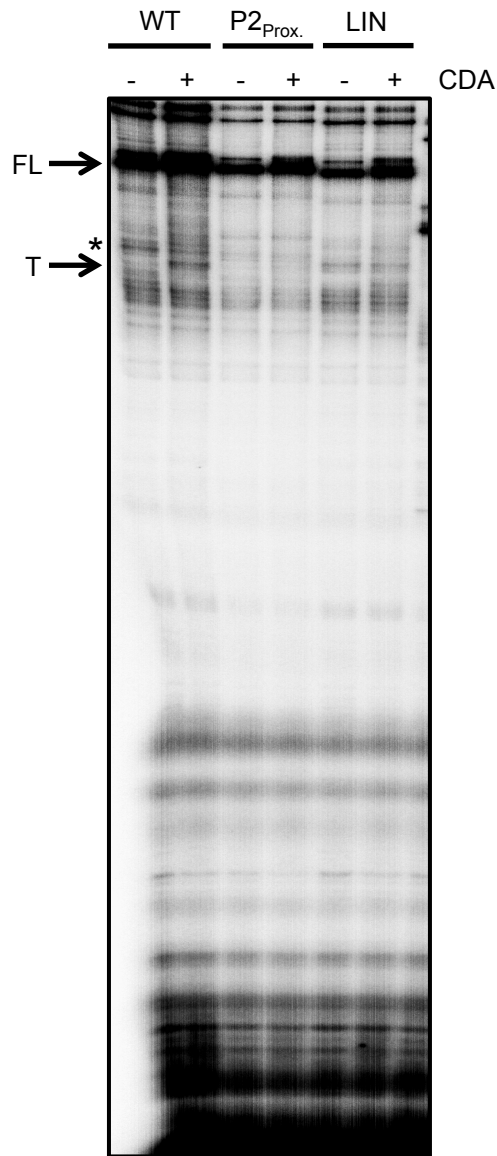

**Fig. S5.** Denaturing polyacrylamide gel electrophoresis analysis of RNA transcribed *in vitro* by bacterial RNA polymerase. Wild-type (WT) and mutant (P2<sub>Prox.</sub>, LIN) *rpfA* riboswitches were transcribed *in vitro* from an engineered *B. subtilis lysC* promoter using *E. coli*  $\sigma^{70}$ -RNA polymerase. Reactions were supplemented with 0  $\mu$ M (-) or 500  $\mu$ M (+) cyclic di-AMP (CDA). Products were intrinsically labeled with  $^{32}$ P, size-fractionated on a denaturing urea-polyacrylamide gel and visualized by phosphorimaging. Image is representative of three biological replicates. FL, full-length transcripts; \*, End of UTR(WT)-*rpfA* moiety (39 nt into the *rpfA* coding sequence); T, terminated transcripts.

**A**

|                                                     |                                                      |
|-----------------------------------------------------|------------------------------------------------------|
| Streptomyces_scabiei_8722                           | -----AAAAGCCCCGCCGTACGGGGGAATGCCAC                   |
| Streptomyces_avermitilis_MA4680                     | -----CGGGACAAGAAAAGCCCCGCCGTACGGGGGAAGACGCAC         |
| Streptomyces_hygroscopicus_subsp_jinggangensis_TL01 | -----AAAATCCCCGCCGTACGGGGGAACACGCAC                  |
| Streptomyces_hygroscopicus_subsp_jinggangensis_5008 | -----AAAATCCCCGCCGTACGGGGGAACACGCAC                  |
| Streptomyces_coelicolor_A32                         | GAACGGAACAAAGCGGAACATGAAAATCCCCGCCGTACGGGGGAACACGCAC |
| Streptomyces_davawensis_JCM4913                     | -----CCCGCCCCGCCGTACGGGGGAACACGCAC                   |
|                                                     | *****                                                |
| Streptomyces_scabiei_8722                           | CGGGCCGG-----                                        |
| Streptomyces_avermitilis_MA4680                     | CGGACCGG-----                                        |
| Streptomyces_hygroscopicus_subsp_jinggangensis_TL01 | CGGGCCGG-----                                        |
| Streptomyces_hygroscopicus_subsp_jinggangensis_5008 | CGGGCCGG-----                                        |
| Streptomyces_coelicolor_A32                         | CGGGCCGGACTCACGGGAC                                  |
| Streptomyces_davawensis_JCM4913                     | CGGGCCGG-----                                        |
|                                                     | *** *****                                            |

**B**

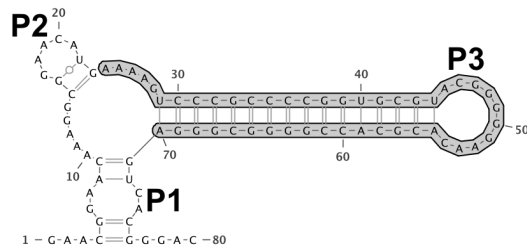

**Fig. S6.** Bioinformatic analysis of *scr3097* homologues from streptomycetes. (A) Bacterial genomes were searched for sequences similar to the *S. coelicolor scr3097*. Similar sequences were aligned. Asterisks indicate conserved nucleotides. (B) Predicted secondary structure of the *S. coelicolor Scr3097*. Conserved sequences and structures are highlighted in gray. The structure was drawn using VARNA.<sup>13</sup>

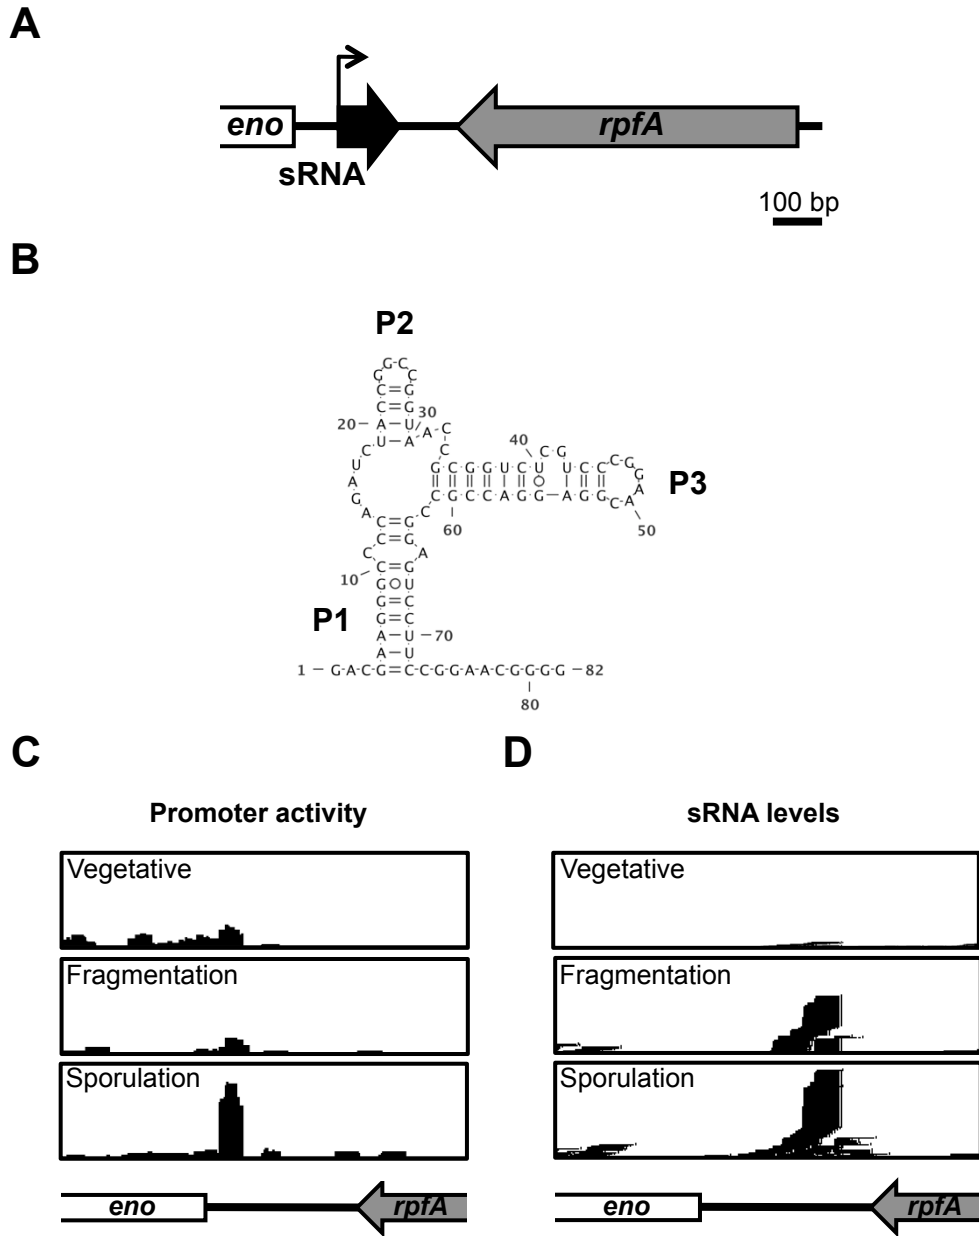

**Fig. S7.** The *rpfA*-associated sRNA of *S. venezuelae*. (A) Genetic context of the *rpfA*-associated sRNA gene of *S. venezuelae*. The black elbow arrow denotes the transcriptional start site of the sRNA gene as predicted using 5' triphosphate end-capture RNA-seq (Matthew Bush and Mark Buttner, unpublished). Genes were drawn to scale. (B) Predicted secondary structure of the mature *S. venezuelae* sRNA. The structure was drawn using VARNA.<sup>13</sup> (C) *S. venezuelae* wild-type strain ATCC 10712 was grown at 30°C in MYM broth. Promoter activity downstream of *rpfA* was monitored throughout development using 5' triphosphate end-capture RNA-seq (Matthew Bush and Mark Buttner, unpublished). (D) *S. venezuelae* wild-type strain ATCC 10712 was grown at 30°C in MYM broth. sRNA transcripts were quantified using RNA-seq (Emma Sherwood, unpublished). Relative read coverage is indicated.

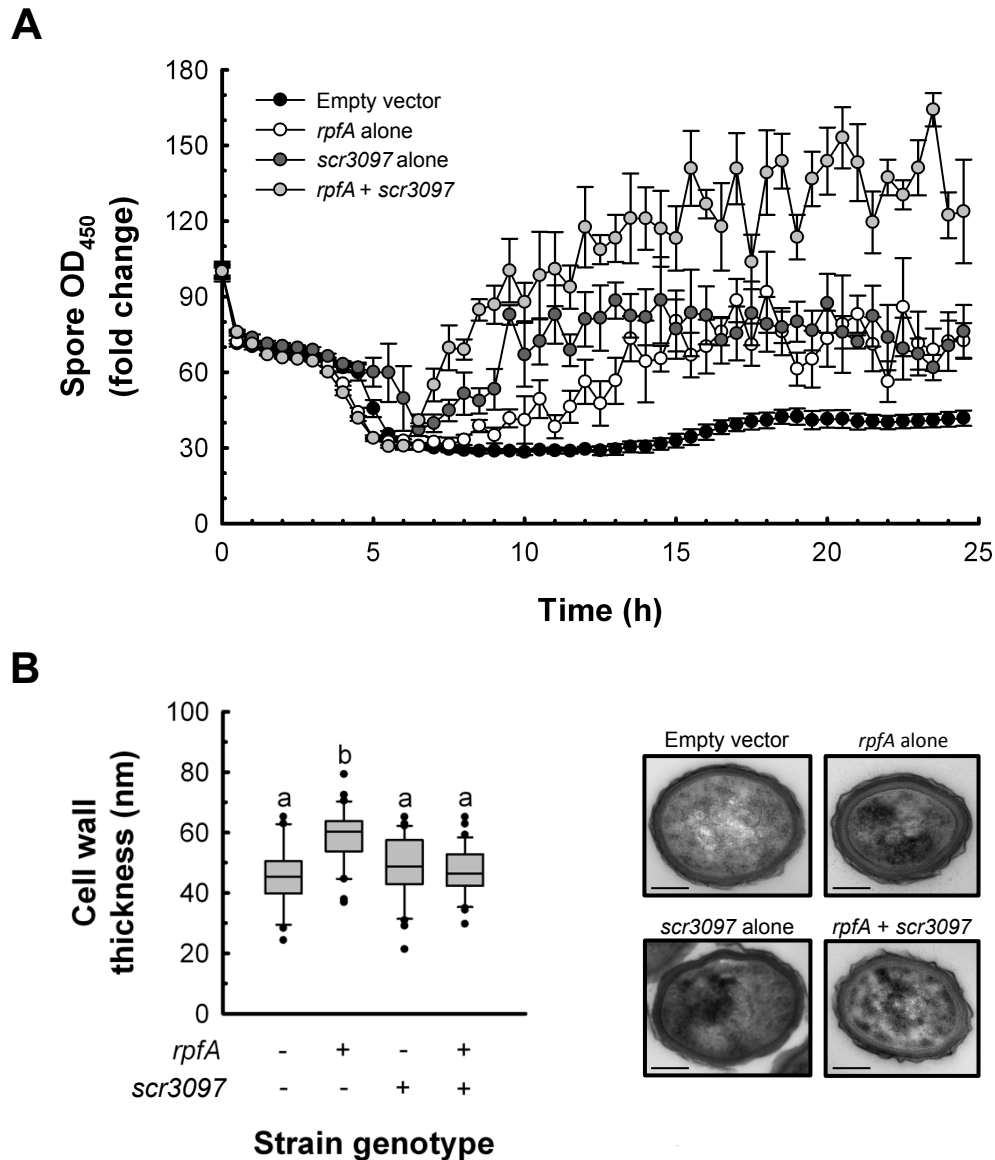

**Fig. S8.** Impact of *scr3097* on spore germination and sporulation. (A) Spores of *S. coelicolor* *rpfA-scr3097* deletion mutant, complemented with or without an ectopic copy of *rpfA* and/or *scr3097*, were germinated at 30°C in TSB:YEME (50:50). The background-subtracted OD<sub>450</sub> was measured periodically and expressed as fold changes relative to initial values, at 0 h. Data are presented as mean ± standard error ( $n = 4$ ). (B) The *S. coelicolor* *rpfA-scr3097* deletion mutant, complemented with or without an ectopic copy of *rpfA* and/or *scr3097*, was grown for 7 days at 30°C on MYM agar. Spores were visualized by transmission electron microscopy, and spore wall thickness was measured. *Left panel.* Box plots specify the median (center line), the 25<sup>th</sup> and 75<sup>th</sup> percentile (bottom and top of box, respectively), the 10<sup>th</sup> and 90<sup>th</sup> percentile (lower and higher whiskers, respectively), and the 5<sup>th</sup> and 95<sup>th</sup> percentile (lower and higher dots, respectively) ( $n = 29-32$ ). Group means annotated with different letters are significantly different.  $F(3,120) = 12.49$ ,  $p < 0.001$ . *Right panel.* Transmission electron micrographs. Bar, 200 nm. Empty vector, E120/pIJ82; *rpfA* alone, E120/pMC241; *scr3097* alone, E120/pMC242; *rpfA* + *scr3097*, E120/pMC243.

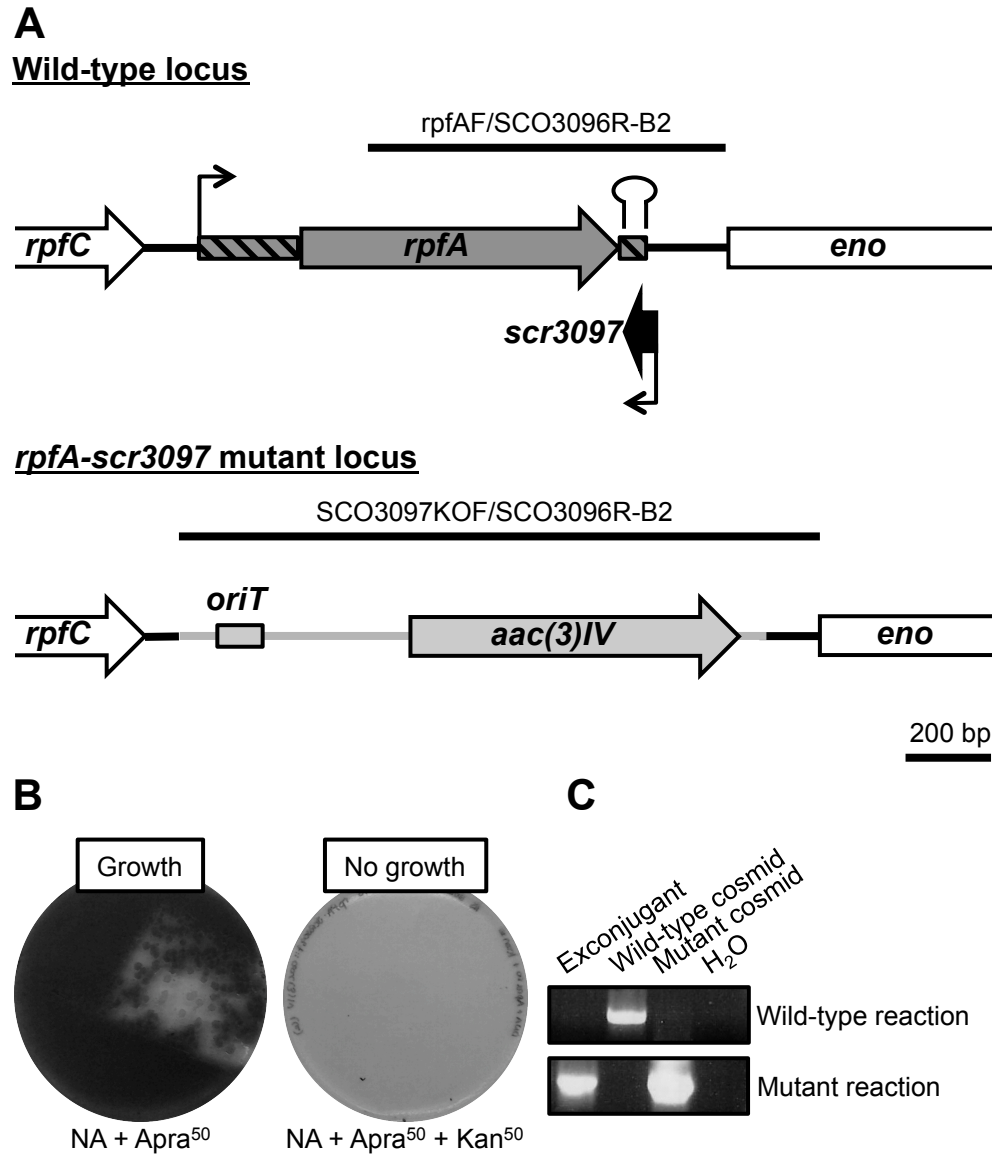

**Fig. S9.** Construction of the *rpfA-scr3097* deletion mutant. (A) Schematic of the *rpfA-scr3097* region in the wild-type and the deletion mutant. Hatched gray blocks indicate the location of the *rpfA* 5' and 3' UTRs, and black elbow arrows denote the transcriptional start sites of *rpfA* and *scr3097* as predicted using 5' rapid amplification of cDNA ends<sup>10</sup> and RNA-seq,<sup>14</sup> respectively. Thick black lines above genes specify the location of the PCR products used to confirm the strain genotype. Primer pairs used are indicated above lines. Schematics were drawn to scale. (B) The *S. coelicolor rpfA-scr3097* deletion mutant (E120) was grown at 30°C on nutrient agar (NA) supplemented with 50  $\mu\text{g mL}^{-1}$  apramycin (Apra<sup>50</sup>)  $\pm$  50  $\mu\text{g mL}^{-1}$  kanamycin (Kan<sup>50</sup>). (C) The genotype of the *rpfA-scr3097* deletion mutant was confirmed by PCR-amplifying the wild-type and mutant loci from crude cell lysates. Wild-type (StE41) and mutant (StE41c) cosmids served as controls. An equal volume of water was added to the 'no template' negative control reactions (H<sub>2</sub>O) instead of DNA template.



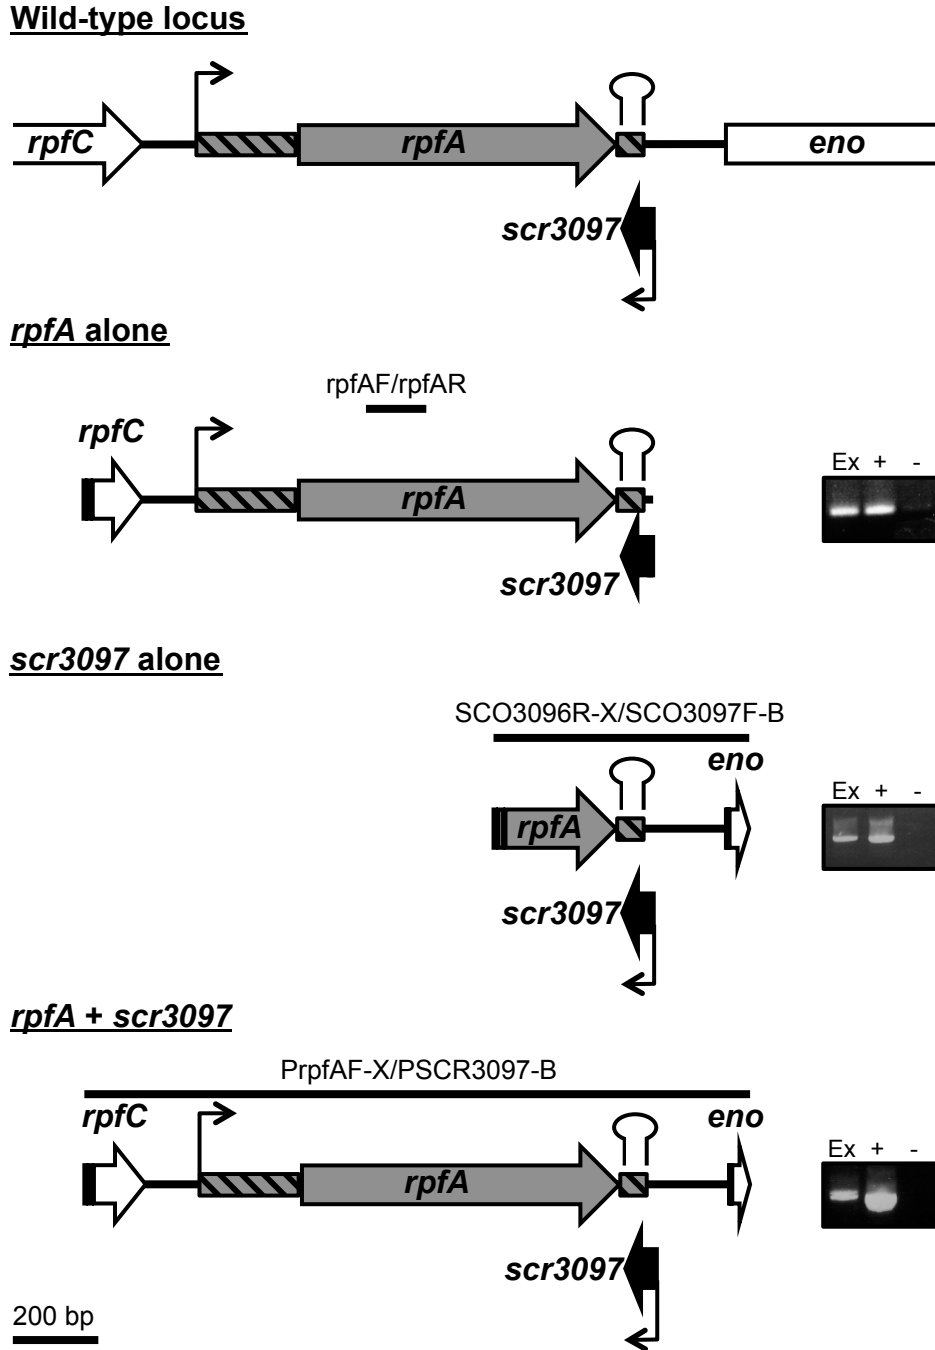

**Fig. S10.** Complementation of the *rpfA-scr3097* deletion mutant. Schematic of the different complementation constructs. Hatched gray blocks indicate the location of the *rpfA* 5' and 3' UTRs, and black elbow arrows denote the transcriptional start sites of *rpfA* and *scr3097* as predicted using 5' rapid amplification of cDNA ends<sup>10</sup> and RNA-seq,<sup>14</sup> respectively. Thick black lines above genes specify the location of the PCR products used to confirm the strain genotype. Primer pairs used are indicated above lines. Schematics were drawn to scale. The genotype of each complemented strain (Ex) was confirmed by PCR-amplifying the re-introduced gene from crude cell lysates. The complementation plasmid (+) and water (-) were used as positive and negative controls, respectively. *rpfA* alone, E120/pMC241; *scr3097* alone, E120/pMC242; *rpfA* + *scr3097*, E120/pMC243.

## Supplementary References

1. Kieser T, Bibb MJ, Buttner MJ, Chater KF, Hopwood DA. Practical *Streptomyces* genetics. Norwich (England): The John Innes Foundation; 2000.
2. Datsenko KA, Wanner BL. One-step inactivation of chromosomal genes in *Escherichia coli* K-12 using PCR products. Proc Natl Acad Sci U S A. 2000; 97:6640-6645.
3. MacNeil DJ, Gewain KM, Ruby CL, Dezeny G, Gibbons PH, MacNeil T. Analysis of *Streptomyces avermitilis* genes required for avermectin biosynthesis utilizing a novel integration vector. Gene. 1992; 111:61-68.
4. Redenbach M, Kieser HM, Denapaite D, Eichner A, Cullum J, Kinashi H, Hopwood DA. A set of ordered cosmids and a detailed genetic and physical map for the 8 Mb *Streptomyces coelicolor* A3(2) chromosome. Mol Microbiol. 1996; 21:77-96.
5. Craney A, Hohenauer T, Xu Y, Navani NK, Li Y, Nodwell J. A synthetic *luxCDABE* gene cluster optimized for expression in high-GC bacteria. Nucleic Acids Res. 2007; 35:e46.
6. Sexton DL, St-Onge RJ, Haiser HJ, Yousef MR, Brady L, Gao C, Leonard J, Elliot MA. Resuscitation-promoting factors are cell wall-lytic enzymes with important roles in the germination and growth of *Streptomyces coelicolor*. J Bacteriol. 2015; 197:848-860.
7. Gust B, Challis GL, Fowler K, Kieser T, Chater KF. PCR-targeted *Streptomyces* gene replacement identifies a protein domain needed for biosynthesis of the sesquiterpene soil odor geosmin. Proc Natl Acad Sci U S A. 2003; 100:1541-1546.
8. St-Onge RJ, Haiser HJ, Yousef MR, Sherwood E, Tschowri N, Al-Bassam M, Elliot MA. Nucleotide second messenger-mediated regulation of a muralytic enzyme in *Streptomyces*. Mol Microbiol. 2015; 96:779-795.
9. Paget MSB, Chamberlin L, Atrih A, Foster SJ, Buttner MJ. Evidence that the extracytoplasmic function sigma factor  $\sigma^E$  is required for normal cell wall structure in *Streptomyces coelicolor* A3(2). J Bacteriol. 1999; 181:204-211.
10. Haiser HJ, Yousef MR, Elliot MA. Cell wall hydrolases affect germination, vegetative growth, and sporulation in *Streptomyces coelicolor*. J Bacteriol. 2009; 191:6501-6512.
11. Hindra, Moody MJ, Jones SE, Elliot MA. Complex intra-operonic dynamics mediated by a small RNA in *Streptomyces coelicolor*. PLoS One. 2014; 9:e85856.
12. Swiercz JP, Hindra, Bobek J, Haiser HJ, Di Berardo C, Tjaden B, Elliot MA. Small non-coding RNAs in *Streptomyces coelicolor*. Nucleic Acids Res. 2008; 36:7240-7251.
13. Darty K, Denise A, Ponty Y. VARNA: interactive drawing and editing of the RNA secondary structure. Bioinformatics. 2009; 25:1974-1975.
14. Moody MJ, Young RA, Jones SE, Elliot MA. Comparative analysis of non-coding RNAs in the antibiotic-producing *Streptomyces* bacteria. BMC Genomics. 2013; 14:558.
